# Supplementary material
Source: PubMed Central journal article supplement (PMC9190030)
Supplement: NIHMS1812545-supplement-Supplement.pdf [file NIHMS1812545-supplement-Supplement.pdf]

\*Indicates required information. Only first name, last name, and suffix will appear in PubMed.

| <b>*Group Name(s): AACR Project GENIE Consortium</b> |                   |                              |                  |                                                   |                                          |                                                         |                                                                                            |
|------------------------------------------------------|-------------------|------------------------------|------------------|---------------------------------------------------|------------------------------------------|---------------------------------------------------------|--------------------------------------------------------------------------------------------|
| <b>*First Name and Middle Initial(s)</b>             | <b>*Last Name</b> | <b>*Suffix (eg, Jr, III)</b> | Academic Degrees | Institution                                       | Location (city, state/province, country) | Role or Contribution, eg, chair, principal investigator | Group (if more than 1 Group listed in the byline) and/or Subgroup (eg, Steering Committee) |
| Shawn                                                | Sweeney           |                              |                  | American Association for Cancer Research          | Philadelphia, PA                         |                                                         |                                                                                            |
| Margaret                                             | Foti              |                              |                  | American Association for Cancer Research          | Philadelphia, PA                         |                                                         |                                                                                            |
| Yekaterina                                           | Khotskaya         |                              |                  | American Association for Cancer Research          | Philadelphia, PA                         |                                                         |                                                                                            |
| Michael                                              | Fiandalo          |                              |                  | American Association for Cancer Research          | Philadelphia, PA                         |                                                         |                                                                                            |
| Benjamin                                             | Gross             |                              |                  | Memorial Sloan Kettering Cancer Center            | New York, NY                             |                                                         |                                                                                            |
| Nikolaus                                             | Schultz           |                              |                  | Memorial Sloan Kettering Cancer Center            | New York, NY                             |                                                         |                                                                                            |
| Brooke                                               | Mastrogiacomio    |                              |                  | Memorial Sloan Kettering Cancer Center            | New York, NY                             |                                                         |                                                                                            |
| Mahdi                                                | Sarmardy          |                              |                  | Children's Hospital of Philadelphia Cancer Center | Philadelphia, PA                         |                                                         |                                                                                            |
| Marilyn                                              | Li                |                              |                  | Children's Hospital of Philadelphia Cancer Center | Philadelphia, PA                         |                                                         |                                                                                            |
| Adam                                                 | Resnick           |                              |                  | Children's Hospital of Philadelphia Cancer Center | Philadelphia, PA                         |                                                         |                                                                                            |
| Angela                                               | Waanders          |                              |                  | Children's Hospital of Philadelphia Cancer Center | Philadelphia, PA                         |                                                         |                                                                                            |
| Jena                                                 | Lilly             |                              |                  | Children's Hospital of Philadelphia Cancer Center | Philadelphia, PA                         |                                                         |                                                                                            |
| Richard                                              | Carvajal          |                              |                  | COLUMBIA                                          | New York, NY                             |                                                         |                                                                                            |
| Raul                                                 | Rabdan            |                              |                  | COLUMBIA                                          | New York, NY                             |                                                         |                                                                                            |
| Matthew                                              | Ingham            |                              |                  | COLUMBIA                                          | New York, NY                             |                                                         |                                                                                            |
| Susan                                                | Hsaio             |                              |                  | COLUMBIA                                          | New York, NY                             |                                                         |                                                                                            |
| Jean                                                 | Abraham           |                              |                  | Cancer Research UK Cambridge Centre               | Cambridge, UK                            |                                                         |                                                                                            |
| James                                                | Brenton           |                              |                  | Cancer Research UK Cambridge Centre               | Cambridge, UK                            |                                                         |                                                                                            |
| Oscar                                                | Rueda             |                              |                  | Cancer Research UK Cambridge Centre               | Cambridge, UK                            |                                                         |                                                                                            |
| Carlos                                               | Caldas            |                              |                  | Cancer Research UK Cambridge Centre               | Cambridge, UK                            |                                                         |                                                                                            |
| Mikel                                                | Valgañón          |                              |                  | Cancer Research UK Cambridge Centre               | Cambridge, UK                            |                                                         |                                                                                            |
| Dilrini                                              | Silva             |                              |                  | Cancer Research UK Cambridge Centre               | Cambridge, UK                            |                                                         |                                                                                            |
| Chris                                                | Bournnell         |                              |                  | Cancer Research UK Cambridge Centre               | Cambridge, UK                            |                                                         |                                                                                            |
| Raquel                                               | Garcia            |                              |                  | Cancer Research UK Cambridge Centre               | Cambridge, UK                            |                                                         |                                                                                            |
| Ezequiel                                             | Rodriguez         |                              |                  | Cancer Research UK Cambridge Centre               | Cambridge, UK                            |                                                         |                                                                                            |
| Birgit                                               | Nimmervoll        |                              |                  | Cancer Research UK Cambridge Centre               | Cambridge, UK                            |                                                         |                                                                                            |
| Ethan                                                | Cerami            |                              |                  | Dana-Farber Cancer Institute                      | Boston, MA                               |                                                         |                                                                                            |
| Matthew                                              | Ducar             |                              |                  | Dana-Farber Cancer Institute                      | Boston, MA                               |                                                         |                                                                                            |
| Priti                                                | Kumari            |                              |                  | Dana-Farber Cancer Institute                      | Boston, MA                               |                                                         |                                                                                            |
| Neal                                                 | Lindeman          |                              |                  | Dana-Farber Cancer Institute                      | Boston, MA                               |                                                         |                                                                                            |
| Laura                                                | MacConnail        |                              |                  | Dana-Farber Cancer Institute                      | Boston, MA                               |                                                         |                                                                                            |
| John                                                 | Orechia           |                              |                  | Dana-Farber Cancer Institute                      | Boston, MA                               |                                                         |                                                                                            |
| Deborah                                              | Schrag            |                              |                  | Dana-Farber Cancer Institute                      | Boston, MA                               |                                                         |                                                                                            |
| Priyanka                                             | Shivdasani        |                              |                  | Dana-Farber Cancer Institute                      | Boston, MA                               |                                                         |                                                                                            |
| Eliezer                                              | Van Allen         |                              |                  | Dana-Farber Cancer Institute                      | Boston, MA                               |                                                         |                                                                                            |
| Jason                                                | Johnson           |                              |                  | Dana-Farber Cancer Institute                      | Boston, MA                               |                                                         |                                                                                            |
| Pasi                                                 | Jänne             |                              |                  | Dana-Farber Cancer Institute                      | Boston, MA                               |                                                         |                                                                                            |
| Eva                                                  | Lepisto           |                              |                  | Dana-Farber Cancer Institute                      | Boston, MA                               |                                                         |                                                                                            |
| Michael                                              | Hassett           |                              |                  | Dana-Farber Cancer Institute                      | Boston, MA                               |                                                         |                                                                                            |

\*Indicates required information. Only first name, last name, and suffix will appear in PubMed.

| *First Name and Middle Initial(s) | *Last Name    | *Suffix (eg, Jr, III) | Academic Degrees | Institution                                                           | Location (city, state/province, country) | Role or Contribution, eg, chair, principal investigator | Group (if more than 1 Group listed in the byline) and/or Subgroup (eg, Steering Committee) |
|-----------------------------------|---------------|-----------------------|------------------|-----------------------------------------------------------------------|------------------------------------------|---------------------------------------------------------|--------------------------------------------------------------------------------------------|
| Sindy                             | Pimentel      |                       |                  | Dana-Farber Cancer Institute                                          | Boston, MA                               |                                                         |                                                                                            |
| Parin                             | Sripakdeevong |                       |                  | Dana-Farber Cancer Institute                                          | Boston, MA                               |                                                         |                                                                                            |
| Katherine                         | Janeway       |                       |                  | Dana-Farber Cancer Institute                                          | Boston, MA                               |                                                         |                                                                                            |
| Jason M.                          | Johnson       |                       |                  | Dana-Farber Cancer Institute                                          | Boston, MA                               |                                                         |                                                                                            |
| Matthew                           | Meyerson      |                       |                  | Dana-Farber Cancer Institute                                          | Boston, MA                               |                                                         |                                                                                            |
| Daniel                            | Quinn         |                       |                  | Dana-Farber Cancer Institute                                          | Boston, MA                               |                                                         |                                                                                            |
| Oya                               | Cushing       |                       |                  | Dana-Farber Cancer Institute                                          | Boston, MA                               |                                                         |                                                                                            |
| Kevin                             | Haigis        |                       |                  | Dana-Farber Cancer Institute                                          | Boston, MA                               |                                                         |                                                                                            |
| Diana                             | Miller        |                       |                  | Dana-Farber Cancer Institute                                          | Boston, MA                               |                                                         |                                                                                            |
| Kenneth                           | Kehl          |                       |                  | Dana-Farber Cancer Institute                                          | Boston, MA                               |                                                         |                                                                                            |
| Alexander                         | Gustav        |                       |                  | Dana-Farber Cancer Institute                                          | Boston, MA                               |                                                         |                                                                                            |
| Angela                            | Tramontano    |                       |                  | Dana-Farber Cancer Institute                                          | Boston, MA                               |                                                         |                                                                                            |
| Simon Arango                      | Baquero       |                       |                  | Dana-Farber Cancer Institute                                          | Boston, MA                               |                                                         |                                                                                            |
| Jonathan                          | Bell          |                       |                  | Duke University Cancer Institute                                      | Durham, NC                               |                                                         |                                                                                            |
| Michelle                          | Green         |                       |                  | Duke University Cancer Institute                                      | Durham, NC                               |                                                         |                                                                                            |
| Shannon                           | McCall        |                       |                  | Duke University Cancer Institute                                      | Durham, NC                               |                                                         |                                                                                            |
| Michael                           | Datto         |                       |                  | Duke University Cancer Institute                                      | Durham, NC                               |                                                         |                                                                                            |
| Fabien                            | Calvo         |                       |                  | Gustave Roussy Cancer Campus                                          | Villejuif, France                        |                                                         |                                                                                            |
| Fabrice                           | Andre         |                       |                  | Gustave Roussy Cancer Campus                                          | Villejuif, France                        |                                                         |                                                                                            |
| Meurice                           | Guillaume     |                       |                  | Gustave Roussy Cancer Campus                                          | Villejuif, France                        |                                                         |                                                                                            |
| Semih                             | Dogan         |                       |                  | Gustave Roussy Cancer Campus                                          | Villejuif, France                        |                                                         |                                                                                            |
| Lacroix                           | Ludovic       |                       |                  | Gustave Roussy Cancer Campus                                          | Villejuif, France                        |                                                         |                                                                                            |
| Jean                              | Scoazec       |                       |                  | Gustave Roussy Cancer Campus                                          | Villejuif, France                        |                                                         |                                                                                            |
| Monica                            | Ardenos       |                       |                  | Gustave Roussy Cancer Campus                                          | Villejuif, France                        |                                                         |                                                                                            |
| Gilles                            | Vassal        |                       |                  | Gustave Roussy Cancer Campus                                          | Villejuif, France                        |                                                         |                                                                                            |
| Stefan                            | Michels       |                       |                  | Gustave Roussy Cancer Campus                                          | Villejuif, France                        |                                                         |                                                                                            |
| Victor                            | Velculescu    |                       |                  | Sidney Kimmel Comprehensive Cancer Center at Johns Hopkins University | Baltimore, MD                            |                                                         |                                                                                            |
| Alexander                         | Baras         |                       |                  | Sidney Kimmel Comprehensive Cancer Center at Johns Hopkins University | Baltimore, MD                            |                                                         |                                                                                            |
| Christopher                       | Gocke         |                       |                  | Sidney Kimmel Comprehensive Cancer Center at Johns Hopkins University | Baltimore, MD                            |                                                         |                                                                                            |
| Julie                             | Brahmer       |                       |                  | Sidney Kimmel Comprehensive Cancer Center at Johns Hopkins University | Baltimore, MD                            |                                                         |                                                                                            |
| Charles                           | Sawyers       |                       |                  | Memorial Sloan Kettering Cancer Center                                | New York, NY                             |                                                         |                                                                                            |
| David                             | Solit         |                       |                  | Memorial Sloan Kettering Cancer Center                                | New York, NY                             |                                                         |                                                                                            |
| Stu                               | Gardos        |                       |                  | Memorial Sloan Kettering Cancer Center                                | New York, NY                             |                                                         |                                                                                            |
| Mike                              | Berger        |                       |                  | Memorial Sloan Kettering Cancer Center                                | New York, NY                             |                                                         |                                                                                            |
| Marc                              | Ladanyi       |                       |                  | Memorial Sloan Kettering Cancer Center                                | New York, NY                             |                                                         |                                                                                            |
| Gregory                           | Riely         |                       |                  | Memorial Sloan Kettering Cancer Center                                | New York, NY                             |                                                         |                                                                                            |

\*Indicates required information. Only first name, last name, and suffix will appear in PubMed.

| *First Name and Middle Initial(s) | *Last Name   | *Suffix (eg, Jr, III) | Academic Degrees | Institution                                                                                            | Location (city, state/province, country) | Role or Contribution, eg, chair, principal investigator | Group (if more than 1 Group listed in the byline) and/or Subgroup (eg, Steering Committee) |
|-----------------------------------|--------------|-----------------------|------------------|--------------------------------------------------------------------------------------------------------|------------------------------------------|---------------------------------------------------------|--------------------------------------------------------------------------------------------|
| Joseph                            | Sirintrapun  |                       |                  | Memorial Sloan Kettering Cancer Center                                                                 | New York, NY                             |                                                         |                                                                                            |
| Katherine                         | Panageas     |                       |                  | Memorial Sloan Kettering Cancer Center                                                                 | New York, NY                             |                                                         |                                                                                            |
| Ari                               | Caroline     |                       |                  | Memorial Sloan Kettering Cancer Center                                                                 | New York, NY                             |                                                         |                                                                                            |
| Joseph                            | Sirintrapun  |                       |                  | Memorial Sloan Kettering Cancer Center                                                                 | New York, NY                             |                                                         |                                                                                            |
| Stacy                             | Thomas       |                       |                  | Memorial Sloan Kettering Cancer Center                                                                 | New York, NY                             |                                                         |                                                                                            |
| Andrew                            | Zarski       |                       |                  | Memorial Sloan Kettering Cancer Center                                                                 | New York, NY                             |                                                         |                                                                                            |
| Ahmet                             | Zehir        |                       |                  | Memorial Sloan Kettering Cancer Center                                                                 | New York, NY                             |                                                         |                                                                                            |
| Alexia                            | Iasonosa     |                       |                  | Memorial Sloan Kettering Cancer Center                                                                 | New York, NY                             |                                                         |                                                                                            |
| John                              | Philip       |                       |                  | Memorial Sloan Kettering Cancer Center                                                                 | New York, NY                             |                                                         |                                                                                            |
| Samantha                          | Brown        |                       |                  | Memorial Sloan Kettering Cancer Center                                                                 | New York, NY                             |                                                         |                                                                                            |
| Andrew                            | Kung         |                       |                  | Memorial Sloan Kettering Cancer Center                                                                 | New York, NY                             |                                                         |                                                                                            |
| Ritika                            | Kundra       |                       |                  | Memorial Sloan Kettering Cancer Center                                                                 | New York, NY                             |                                                         |                                                                                            |
| Julia                             | Rudolph      |                       |                  | Memorial Sloan Kettering Cancer Center                                                                 | New York, NY                             |                                                         |                                                                                            |
| Jessica                           | Lavery       |                       |                  | Memorial Sloan Kettering Cancer Center                                                                 | New York, NY                             |                                                         |                                                                                            |
| Hira                              | Rivzi        |                       |                  | Memorial Sloan Kettering Cancer Center                                                                 | New York, NY                             |                                                         |                                                                                            |
| Julian                            | Schwartz     |                       |                  | Memorial Sloan Kettering Cancer Center                                                                 | New York, NY                             |                                                         |                                                                                            |
| Caroline                          | McCarthy     |                       |                  | Memorial Sloan Kettering Cancer Center                                                                 | New York, NY                             |                                                         |                                                                                            |
| Maufur                            | Bhuiya       |                       |                  | Memorial Sloan Kettering Cancer Center                                                                 | New York, NY                             |                                                         |                                                                                            |
| Axel                              | Martin       |                       |                  | Memorial Sloan Kettering Cancer Center                                                                 | New York, NY                             |                                                         |                                                                                            |
| Cynthia                           | Chu          |                       |                  | Memorial Sloan Kettering Cancer Center                                                                 | New York, NY                             |                                                         |                                                                                            |
| Raymond                           | DuBois       |                       |                  | Medical University of South Carolina                                                                   | Charleston, SC                           |                                                         |                                                                                            |
| Tony                              | van de Velde |                       |                  | The Netherlands Cancer Institute, Amsterdam, on behalf of the Center for Personalized Cancer Treatment | Utrecht, The Netherlands                 |                                                         |                                                                                            |
| Geritt                            | Meijer       |                       |                  | The Netherlands Cancer Institute, Amsterdam, on behalf of the Center for Personalized Cancer Treatment | Utrecht, The Netherlands                 |                                                         |                                                                                            |
| Hugo                              | Horlings     |                       |                  | The Netherlands Cancer Institute, Amsterdam, on behalf of the Center for Personalized Cancer Treatment | Utrecht, The Netherlands                 |                                                         |                                                                                            |
| Harm                              | van Tinteren |                       |                  | The Netherlands Cancer Institute, Amsterdam, on behalf of the Center for Personalized Cancer Treatment | Utrecht, The Netherlands                 |                                                         |                                                                                            |
| Martijn                           | Lolkema      |                       |                  | The Netherlands Cancer Institute, Amsterdam, on behalf of the Center for Personalized Cancer Treatment | Utrecht, The Netherlands                 |                                                         |                                                                                            |
| Les                               | Nijman       |                       |                  | The Netherlands Cancer Institute, Amsterdam, on behalf of the Center for Personalized Cancer Treatment | Utrecht, The Netherlands                 |                                                         |                                                                                            |

\*Indicates required information. Only first name, last name, and suffix will appear in PubMed.

| *First Name and Middle Initial(s) | *Last Name | *Suffix (eg, Jr, III) | Academic Degrees | Institution                                                                                            | Location (city, state/province, country) | Role or Contribution, eg, chair, principal investigator | Group (if more than 1 Group listed in the byline) and/or Subgroup (eg, Steering Committee) |
|-----------------------------------|------------|-----------------------|------------------|--------------------------------------------------------------------------------------------------------|------------------------------------------|---------------------------------------------------------|--------------------------------------------------------------------------------------------|
| Mariska                           | Bierkens   |                       |                  | The Netherlands Cancer Institute, Amsterdam, on behalf of the Center for Personalized Cancer Treatment | Utrecht, The Netherlands                 |                                                         |                                                                                            |
| Jelle                             | Hoeve      |                       |                  | The Netherlands Cancer Institute, Amsterdam, on behalf of the Center for Personalized Cancer Treatment | Utrecht, The Netherlands                 |                                                         |                                                                                            |
| Emilie                            | Voest      |                       |                  | The Netherlands Cancer Institute, Amsterdam, on behalf of the Center for Personalized Cancer Treatment | Utrecht, The Netherlands                 |                                                         |                                                                                            |
| Annemieke                         | Hiemstra   |                       |                  | The Netherlands Cancer Institute, Amsterdam, on behalf of the Center for Personalized Cancer Treatment | Utrecht, The Netherlands                 |                                                         |                                                                                            |
| Gabe                              | Sonke      |                       |                  | The Netherlands Cancer Institute, Amsterdam, on behalf of the Center for Personalized Cancer Treatment | Utrecht, The Netherlands                 |                                                         |                                                                                            |
| Jacques                           | Craenmehr  |                       |                  | The Netherlands Cancer Institute, Amsterdam, on behalf of the Center for Personalized Cancer Treatment | Utrecht, The Netherlands                 |                                                         |                                                                                            |
| Jan                               | Hudecek    |                       |                  | The Netherlands Cancer Institute, Amsterdam, on behalf of the Center for Personalized Cancer Treatment | Utrecht, The Netherlands                 |                                                         |                                                                                            |
| Kim                               | Monkhorst  |                       |                  | The Netherlands Cancer Institute, Amsterdam, on behalf of the Center for Personalized Cancer Treatment | Utrecht, The Netherlands                 |                                                         |                                                                                            |
| Walter                            | Urba       |                       |                  | Providence Cancer Institute                                                                            | Portland, Oregon                         |                                                         |                                                                                            |
| Brady                             | Bernard    |                       |                  | Providence Cancer Institute                                                                            | Portland, Oregon                         |                                                         |                                                                                            |
| Brian                             | Piening    |                       |                  | Providence Cancer Institute                                                                            | Portland, Oregon                         |                                                         |                                                                                            |
| Carlo                             | Bifulco    |                       |                  | Providence Cancer Institute                                                                            | Portland, Oregon                         |                                                         |                                                                                            |
| Paul                              | Tittel     |                       |                  | Providence Cancer Institute                                                                            | Portland, Oregon                         |                                                         |                                                                                            |
| Julie                             | Cramer     |                       |                  | Providence Cancer Institute                                                                            | Portland, Oregon                         |                                                         |                                                                                            |
| Justin                            | Guinney    |                       |                  | SAGE Bionetworks                                                                                       | Seattle, WA                              |                                                         |                                                                                            |
| Thomas                            | Yu         |                       |                  | SAGE Bionetworks                                                                                       | Seattle, WA                              |                                                         |                                                                                            |
| Xindi                             | Guo        |                       |                  | SAGE Bionetworks                                                                                       | Seattle, WA                              |                                                         |                                                                                            |
| Alyssa                            | Acebedo    |                       |                  | SAGE Bionetworks                                                                                       | Seattle, WA                              |                                                         |                                                                                            |
| Philip                            | Gold       |                       |                  | Swedish Cancer Institute                                                                               | Seattle, WA                              |                                                         |                                                                                            |
| Neil                              | Bailey     |                       |                  | Swedish Cancer Institute                                                                               | Seattle, WA                              |                                                         |                                                                                            |
| Sabah                             | Kadri      |                       |                  | The University of Chicago Comprehensive Cancer Center                                                  | Chicago, IL                              |                                                         |                                                                                            |
| Jeremy                            | Segal      |                       |                  | The University of Chicago Comprehensive Cancer Center                                                  | Chicago, IL                              |                                                         |                                                                                            |

\*Indicates required information. Only first name, last name, and suffix will appear in PubMed.

| *First Name and Middle Initial(s) | *Last Name    | *Suffix (eg, Jr, III) | Academic Degrees | Institution                                                                            | Location (city, state/province, country) | Role or Contribution, eg, chair, principal investigator | Group (if more than 1 Group listed in the byline) and/or Subgroup (eg, Steering Committee) |
|-----------------------------------|---------------|-----------------------|------------------|----------------------------------------------------------------------------------------|------------------------------------------|---------------------------------------------------------|--------------------------------------------------------------------------------------------|
| Wanjari                           | Pankhuri      |                       |                  | The University of Chicago Comprehensive Cancer Center                                  | Chicago, IL                              |                                                         |                                                                                            |
| Peng                              | Wang          |                       |                  | The University of Chicago Comprehensive Cancer Center                                  | Chicago, IL                              |                                                         |                                                                                            |
| Steinhardt                        | George        |                       |                  | The University of Chicago Comprehensive Cancer Center                                  | Chicago, IL                              |                                                         |                                                                                            |
| Moung                             | Christine     |                       |                  | University of California-San Francisco Helen Diller Family Comprehensive Cancer Center | San Francisco, CA                        |                                                         |                                                                                            |
| Laura                             | Van't Veer    |                       |                  | University of California-San Francisco Helen Diller Family Comprehensive Cancer Center | San Francisco, CA                        |                                                         |                                                                                            |
| Eric                              | Talevich      |                       |                  | University of California-San Francisco Helen Diller Family Comprehensive Cancer Center | San Francisco, CA                        |                                                         |                                                                                            |
| Amanda                            | Wren          |                       |                  | University of California-San Francisco Helen Diller Family Comprehensive Cancer Center | San Francisco, CA                        |                                                         |                                                                                            |
| Alejandro                         | Sweet-Cordero |                       |                  | University of California-San Francisco Helen Diller Family Comprehensive Cancer Center | San Francisco, CA                        |                                                         |                                                                                            |
| Michelle                          | Turski        |                       |                  | University of California-San Francisco Helen Diller Family Comprehensive Cancer Center | San Francisco, CA                        |                                                         |                                                                                            |
| Philippe                          | Bedard        |                       |                  | Princess Margaret Cancer Centre                                                        | Toronto, Ontario, Canada                 |                                                         |                                                                                            |
| Suzanne                           | KamelReid     |                       |                  | Princess Margaret Cancer Centre                                                        | Toronto, Ontario, Canada                 |                                                         |                                                                                            |
| Zhibin                            | Lu            |                       |                  | Princess Margaret Cancer Centre                                                        | Toronto, Ontario, Canada                 |                                                         |                                                                                            |
| Trevor                            | Pugh          |                       |                  | Princess Margaret Cancer Centre                                                        | Toronto, Ontario, Canada                 |                                                         |                                                                                            |
| Lillian                           | Siu           |                       |                  | Princess Margaret Cancer Centre                                                        | Toronto, Ontario, Canada                 |                                                         |                                                                                            |
| Stuart                            | Watt          |                       |                  | Princess Margaret Cancer Centre                                                        | Toronto, Ontario, Canada                 |                                                         |                                                                                            |
| Natasha                           | Leighl        |                       |                  | Princess Margaret Cancer Centre                                                        | Toronto, Ontario, Canada                 |                                                         |                                                                                            |
| Celeste                           | Yu            |                       |                  | Princess Margaret Cancer Centre                                                        | Toronto, Ontario, Canada                 |                                                         |                                                                                            |
| Lailah                            | Ahmed         |                       |                  | Princess Margaret Cancer Centre                                                        | Toronto, Ontario, Canada                 |                                                         |                                                                                            |
| Geeta                             | Krishna       |                       |                  | Princess Margaret Cancer Centre                                                        | Toronto, Ontario, Canada                 |                                                         |                                                                                            |
| Carlos                            | Virtaenen     |                       |                  | Princess Margaret Cancer Centre                                                        | Toronto, Ontario, Canada                 |                                                         |                                                                                            |

\*Indicates required information. Only first name, last name, and suffix will appear in PubMed.

| *First Name and Middle Initial(s) | *Last Name        | *Suffix (eg, Jr, III) | Academic Degrees | Institution                                                                 | Location (city, state/province, country) | Role or Contribution, eg, chair, principal investigator | Group (if more than 1 Group listed in the byline) and/or Subgroup (eg, Steering Committee) |
|-----------------------------------|-------------------|-----------------------|------------------|-----------------------------------------------------------------------------|------------------------------------------|---------------------------------------------------------|--------------------------------------------------------------------------------------------|
| Helen                             | Chow              |                       |                  | Princess Margaret Cancer Centre                                             | Toronto, Ontario, Canada                 |                                                         |                                                                                            |
| Demi                              | Plagianakos       |                       |                  | Princess Margaret Cancer Centre                                             | Toronto, Ontario, Canada                 |                                                         |                                                                                            |
| Samantha                          | Del Rossi         |                       |                  | Princess Margaret Cancer Centre                                             | Toronto, Ontario, Canada                 |                                                         |                                                                                            |
| Nitthusha                         | Singaravelan      |                       |                  | Princess Margaret Cancer Centre                                             | Toronto, Ontario, Canada                 |                                                         |                                                                                            |
| Sevan                             | Hakgor            |                       |                  | Princess Margaret Cancer Centre                                             | Toronto, Ontario, Canada                 |                                                         |                                                                                            |
| Nazish                            | Qazi              |                       |                  | Princess Margaret Cancer Centre                                             | Toronto, Ontario, Canada                 |                                                         |                                                                                            |
| Alisha                            | Nguyen            |                       |                  | Princess Margaret Cancer Centre                                             | Toronto, Ontario, Canada                 |                                                         |                                                                                            |
| Natalie                           | Stickle           |                       |                  | Princess Margaret Cancer Centre                                             | Toronto, Ontario, Canada                 |                                                         |                                                                                            |
| Thomas                            | Stricker          |                       |                  | Vanderbilt-Ingram Cancer Center                                             | Nashville, TN                            |                                                         |                                                                                            |
| Christine                         | Micheel           |                       |                  | Vanderbilt-Ingram Cancer Center                                             | Nashville, TN                            |                                                         |                                                                                            |
| Ingrid                            | Anderson          |                       |                  | Vanderbilt-Ingram Cancer Center                                             | Nashville, TN                            |                                                         |                                                                                            |
| Leigh                             | Jones             |                       |                  | Vanderbilt-Ingram Cancer Center                                             | Nashville, TN                            |                                                         |                                                                                            |
| Lucy                              | Wang              |                       |                  | Vanderbilt-Ingram Cancer Center                                             | Nashville, TN                            |                                                         |                                                                                            |
| Christine                         | Lovly             |                       |                  | Vanderbilt-Ingram Cancer Center                                             | Nashville, TN                            |                                                         |                                                                                            |
| Lucy                              | Wang              |                       |                  | Vanderbilt-Ingram Cancer Center                                             | Nashville, TN                            |                                                         |                                                                                            |
| Michele                           | LeNoue Newton     |                       |                  | Vanderbilt-Ingram Cancer Center                                             | Nashville, TN                            |                                                         |                                                                                            |
| Ben                               | Park              |                       |                  | Vanderbilt-Ingram Cancer Center                                             | Nashville, TN                            |                                                         |                                                                                            |
| Jeremy                            | Warner            |                       |                  | Vanderbilt-Ingram Cancer Center                                             | Nashville, TN                            |                                                         |                                                                                            |
| Daniel                            | Fabbri            |                       |                  | Vanderbilt-Ingram Cancer Center                                             | Nashville, TN                            |                                                         |                                                                                            |
| Joseph                            | Coco              |                       |                  | Vanderbilt-Ingram Cancer Center                                             | Nashville, TN                            |                                                         |                                                                                            |
| Chen                              | Ye                |                       |                  | Vanderbilt-Ingram Cancer Center                                             | Nashville, TN                            |                                                         |                                                                                            |
| Sandip                            | Chaugai           |                       |                  | Vanderbilt-Ingram Cancer Center                                             | Nashville, TN                            |                                                         |                                                                                            |
| Sanjay                            | Mishra            |                       |                  | Vanderbilt-Ingram Cancer Center                                             | Nashville, TN                            |                                                         |                                                                                            |
| Yuanchu James                     | Yang              |                       |                  | Vanderbilt-Ingram Cancer Center                                             | Nashville, TN                            |                                                         |                                                                                            |
| Li                                | Wen               |                       |                  | Vanderbilt-Ingram Cancer Center                                             | Nashville, TN                            |                                                         |                                                                                            |
| Rodrigo                           | Dienstmann        |                       |                  | Vall d' Hebron Institute of Oncology                                        | Barcelona, Spain                         |                                                         |                                                                                            |
| Susana                            | Aguilar Izquierdo |                       |                  | Vall d' Hebron Institute of Oncology                                        | Barcelona, Spain                         |                                                         |                                                                                            |
| Cristina                          | Viaplana Donato   |                       |                  | Vall d' Hebron Institute of Oncology                                        | Barcelona, Spain                         |                                                         |                                                                                            |
| Francesco                         | Mancuso           |                       |                  | Vall d' Hebron Institute of Oncology                                        | Barcelona, Spain                         |                                                         |                                                                                            |
| Umit                              | Topaloglu         |                       |                  | Wake Forest University Health Sciences (Wake Forest Baptist Medical Center) | Winston-Salem, NC                        |                                                         |                                                                                            |

\*Indicates required information. Only first name, last name, and suffix will appear in PubMed.

| *First Name and Middle Initial(s) | *Last Name | *Suffix (eg, Jr, III) | Academic Degrees | Institution                                                                 | Location (city, state/province, country) | Role or Contribution, eg, chair, principal investigator | Group (if more than 1 Group listed in the byline) and/or Subgroup (eg, Steering Committee) |
|-----------------------------------|------------|-----------------------|------------------|-----------------------------------------------------------------------------|------------------------------------------|---------------------------------------------------------|--------------------------------------------------------------------------------------------|
| Liang                             | Liu        |                       |                  | Wake Forest University Health Sciences (Wake Forest Baptist Medical Center) | Winston-Salem, NC                        |                                                         |                                                                                            |
| Meijian                           | Guan       |                       |                  | Wake Forest University Health Sciences (Wake Forest Baptist Medical Center) | Winston-Salem, NC                        |                                                         |                                                                                            |
| Wei                               | Zhang      |                       |                  | Wake Forest University Health Sciences (Wake Forest Baptist Medical Center) | Winston-Salem, NC                        |                                                         |                                                                                            |
| Guangxu                           | Jin        |                       |                  | Wake Forest University Health Sciences (Wake Forest Baptist Medical Center) | Winston-Salem, NC                        |                                                         |                                                                                            |
| James                             | Knight     |                       |                  | Yale University Cancer Center                                               | New Haven, CT                            |                                                         |                                                                                            |
| Michael                           | D'Eletto   |                       |                  | Yale University Cancer Center                                               | New Haven, CT                            |                                                         |                                                                                            |
| E. Zeynep                         | Ormay      |                       |                  | Yale University Cancer Center                                               | New Haven, CT                            |                                                         |                                                                                            |
| Shrikant                          | Mane       |                       |                  | Yale University Cancer Center                                               | New Haven, CT                            |                                                         |                                                                                            |
| Kaya                              | Bilguvar   |                       |                  | Yale University Cancer Center                                               | New Haven, CT                            |                                                         |                                                                                            |
| Walther                           | Zenta      |                       |                  | Yale University Cancer Center                                               | New Haven, CT                            |                                                         |                                                                                            |
| Daniel                            | Dykas      |                       |                  | Yale University Cancer Center                                               | New Haven, CT                            |                                                         |                                                                                            |
